# Supplementary material for: Conserved cholesterol-related activities of Dispatched 1 drive Sonic hedgehog shedding from the cell membrane
Source: Oxford University Press journal article supplement (doi:10.1242/jcs.258672), 2021-07-26
Supplement: jcs258672supp.pdf [file jcs258672supp.pdf]

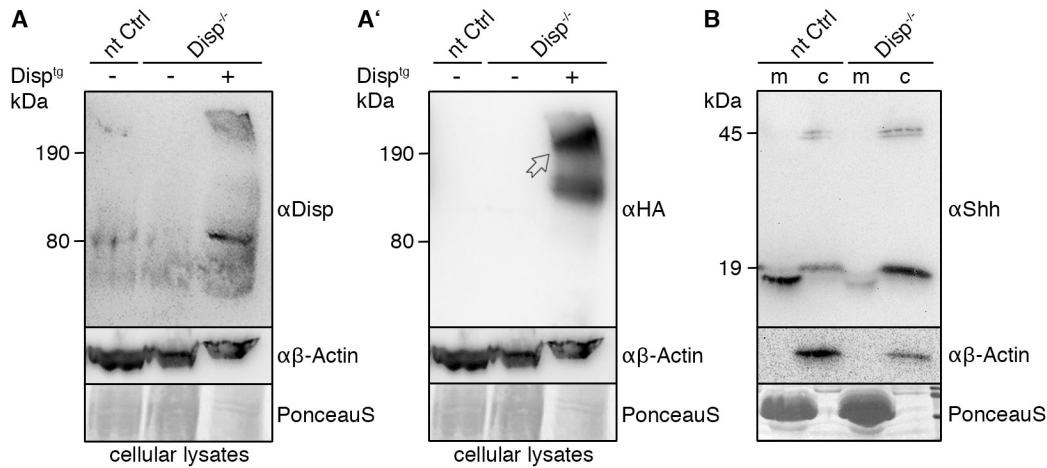

**Fig. S1. Loss of Disp protein expression and unimpaired Shh autoprocessing in Disp<sup>-/-</sup> cells.**

**A)** Disp<sup>-/-</sup> cellular lysates were analyzed by SDS-PAGE/immunoblotting. Full-length Disp (exceeding 190kDa) and degradation products (80kDa) were detected in nt Ctrl and transfected (Disp<sup>tg</sup>-expressing) Disp<sup>-/-</sup> cells. Untransfected Disp<sup>-/-</sup> cells lack both signals (center lane). **A')** Notably, Disp clusters do not fully disrupt but partially degrade under SDS-PAGE conditions (Stewart et al., 2018), which is confirmed on the same (stripped) blot by specific detection of HA-tagged Disp<sup>tg</sup> at the established (Stewart et al., 2018) increased size (arrow). **B)** Similar autoprocessing of 45kDa Shh precursor proteins into cholesteroylated, 19kDa products in nt Ctrl and Disp<sup>-/-</sup> cells (c). Note that media (m) contain soluble Shh proteins that show increased electrophoretic mobility over their cellular precursors (c).

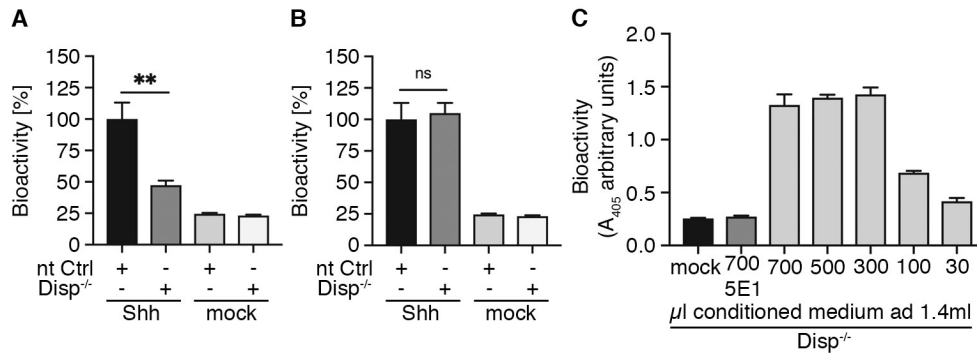

**Fig. S2. Soluble truncated Shh and MβCD-released Shh are bioactive. A)** Quantification of Shh bioactivity. Shh was released from transfected nt Ctrl and Disp<sup>-/-</sup> cells, the conditioned medium adjusted to 10% FCS, added to C3H10T1/2 reporter cells, and the cells incubated for 6 days before analysis. Truncated soluble Shh induced C3H10T1/2 differentiation into alkaline phosphatase-producing osteoblasts. Alkaline phosphatase activity was used as a read-out for Shh biofunction and is expressed relative to C3H10T1/2 cells incubated with supernatants of Shh-transfected nt Ctrl cells (set to 100%). Compared with Shh release from nt Ctrl cells, reduced Shh solubilization from Disp<sup>-/-</sup> cells corresponded well with reduced Shh bioactivity. n=3, unpaired two-tailed t-test. **B)** After protein normalization, Shh released from Disp<sup>-/-</sup> cells was as bioactive as the material released from nt Ctrl cells. This finding supports that reduced Shh biofunction as a consequence of Disp deletion solely results from reduced Shh solubilization and not from the possible secretion of “inactivated” proteins. It also demonstrates that the associated loss of the N-palmitate does not abolish Shh biofunction. n=3, unpaired two-tailed t-test. **C)** Shh was released over night from transfected Disp<sup>-/-</sup> cells in the presence of 500μg/ml MbCD, indicated amounts of supernatant adjusted to 1.4ml and added to C3H10T1/2 cells. Alkaline phosphatase activity was directly determined as a read-out for Shh bioactivity. 1.5μg 5E1 (an antibody established to interfere with Shh/Ptc receptor binding) completely blocked Shh biofunction, confirming specificity of the assay. n=3 datasets from 1 experiment.

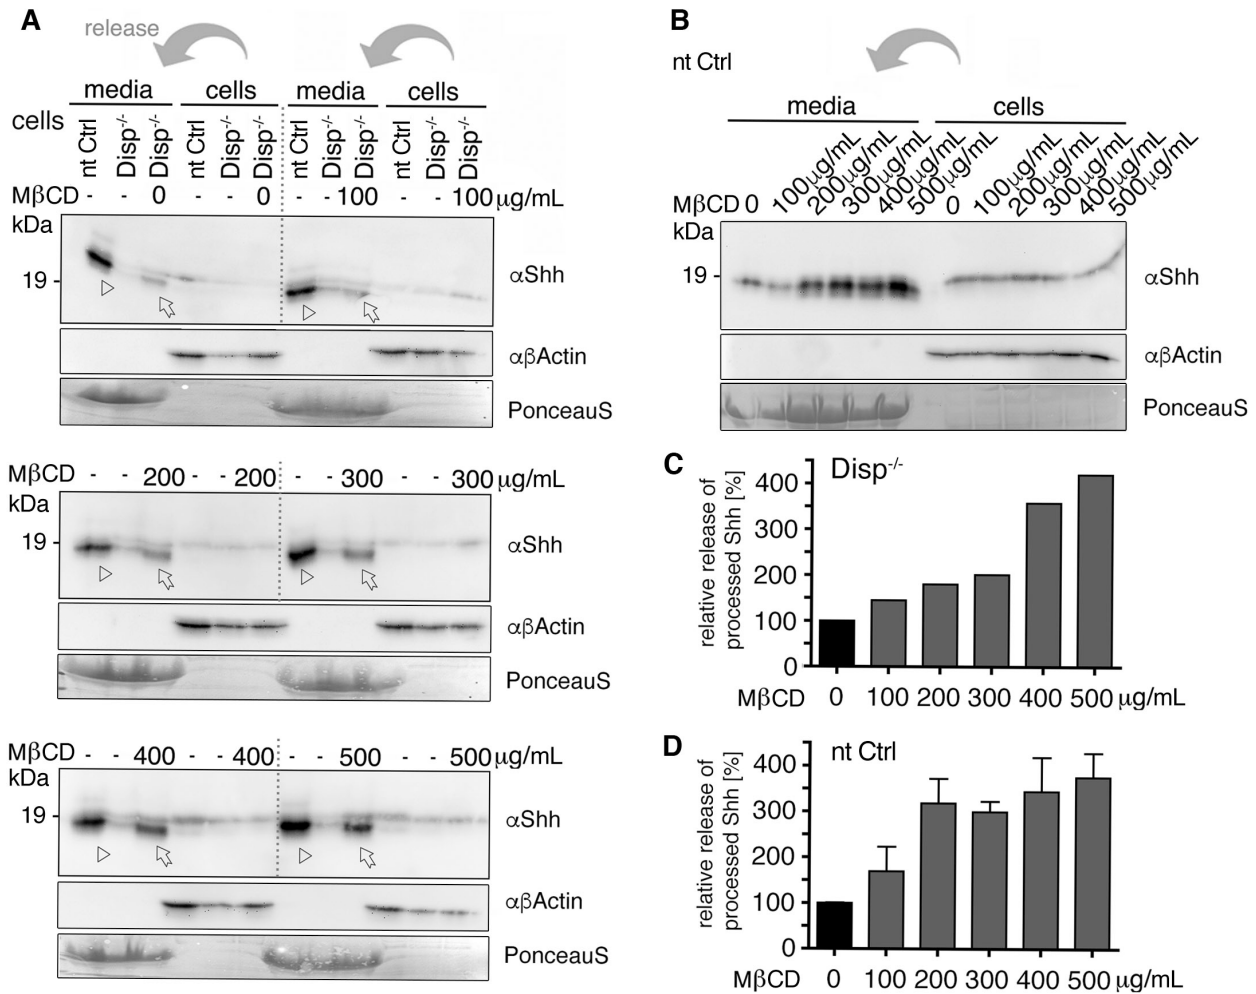

**Fig. S3. MβCD increases Shh release from nt Ctrl and from Disp<sup>-/-</sup> cells in dose-dependent manner.** **A)** 0 to 500 μg/mL MβCD increased processed Shh release from Disp<sup>-/-</sup> cells over a 6 h period (arrows). Shh release was compared with untreated Disp<sup>-/-</sup> cells (adjacent lanes on the left) and Shh amounts released from nt Ctrl cells in the absence of MβCD (far left lanes, arrowheads). Anti-β-Actin and PonceauS served as loading controls. **B)** 0 to 500 μg/mL MβCD were used to release processed Shh from nt Ctrl cells. **C, D)** Quantification of processed Shh release as shown in A, B.

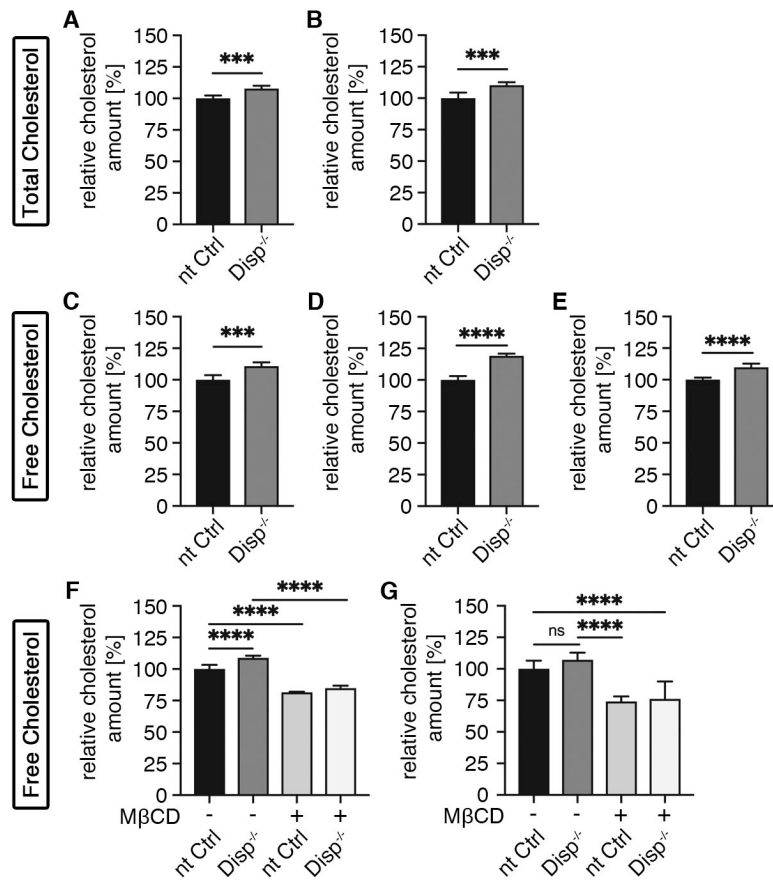

**Fig. S4. Quantification of total and free (unesterified) cholesterol in nt Ctrl and Disp<sup>-/-</sup> cells.** Two out of two conducted total cholesterol quantification assays (**A**, **B**) and four of five conducted free cholesterol quantification assays (**C-F**) revealed increased cholesterol in Disp<sup>-/-</sup> cells if compared with nt Ctrl cells. Only one out of seven independently conducted assays (biological replicates) did not demonstrate a significant cholesterol increase in Disp<sup>-/-</sup> cells (**G**). Pooled results from C-G are shown in Fig. 4C. MβCD consistently depleted free cellular cholesterol from the cells (**F**, **G**), confirming validity of the assay. A: n=5. B: A second independent nt Ctrl and Disp<sup>-/-</sup> cell line displayed similar results, n=6. C: n=6. D: n=5. E: n=6. F: n=6. G: n=6. A, B, C, D, E: Unpaired two-tailed t-test in each assay. F, G: One-way ANOVA, Sidak's multiple comparison post hoc test in each assay.

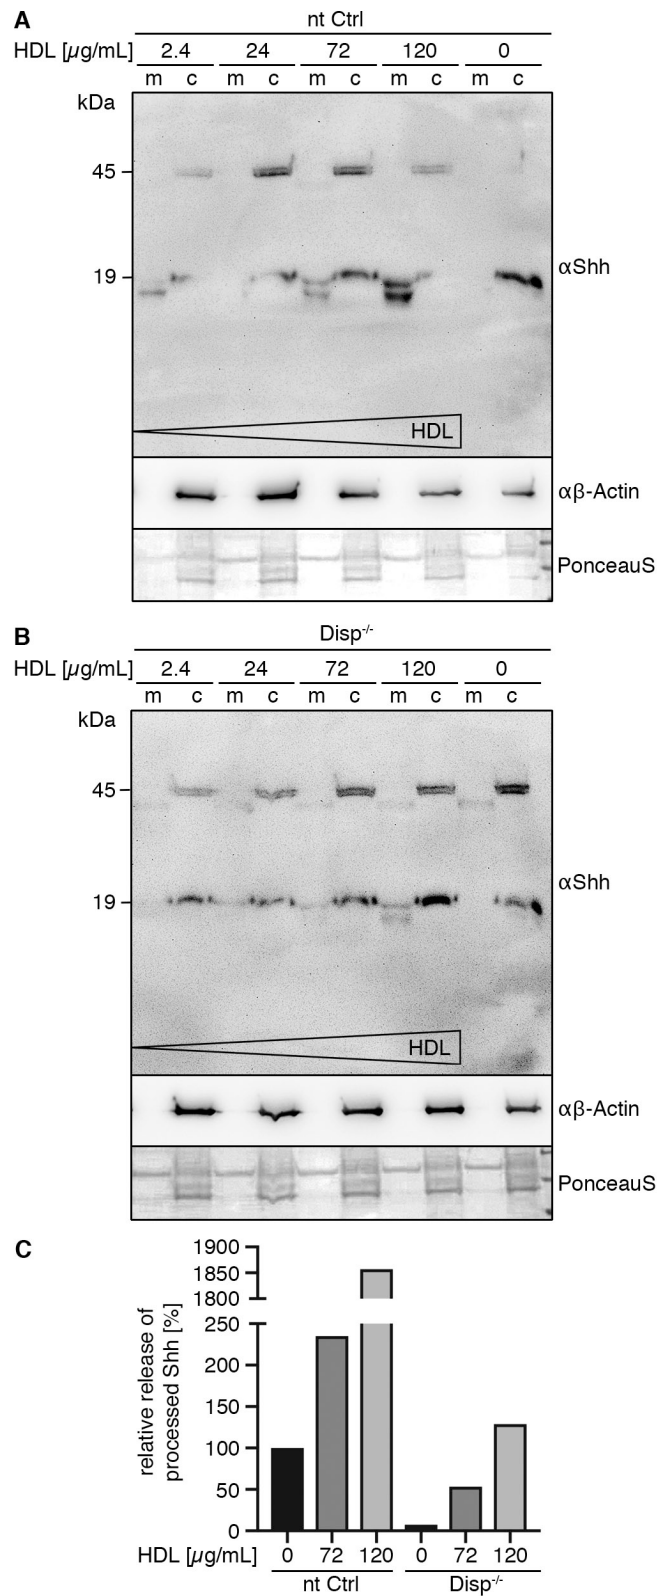

**Fig. S5. HDL dose-dependently enhances Shh release in nt Ctrl cells, but much less so in Disp<sup>-/-</sup> cells. A, B)** HDL added to serum free media, ranging in concentrations from 0  $\mu\text{g/mL}$  to 120  $\mu\text{g/mL}$ , increasingly enhanced Shh release in nt Ctrl cells but much less so from Disp<sup>-/-</sup> cells. Anti- $\beta$ -Actin and PonceauS served as loading controls. **C)** Quantification of the relative release of processed Shh from lipidated precursors on expressing cells, as shown in A and B.

**Table S1.**

**Predicted guide RNA off-targets remained unaffected.** Predicted off-target sites of Displ1 guide RNA by CRISPOR were analyzed by DNA sequencing and their wild-type (WT) sequences were confirmed.

| Predicted off-target | Accession number | Result                |
|----------------------|------------------|-----------------------|
| YLPM1                | NM_019589        | WT sequence confirmed |
| LINC01304            | NR_037881        | WT sequence confirmed |
| APLF                 | NM_173545        | WT sequence confirmed |
| MINK1                | NG_028005        | WT sequence confirmed |
| SLC26A9              | NM_052934        | WT sequence confirmed |

**Table S2. Raw data used for the figures in this study.**

| Figure |                     |                     | Value (Mean) | SD     |
|--------|---------------------|---------------------|--------------|--------|
| 2B'    | nt Ctrl             |                     | 100%         | 21.07  |
|        | Disp <sup>-/-</sup> |                     | 26.78%       | 20.63  |
| 2C'    | nt Ctrl             |                     | 100%         | 29.41  |
|        | Disp <sup>-/-</sup> |                     | 76.32%       | 57.46  |
| 2D'    | nt Ctrl             |                     | 100%         | 8.443  |
|        | Disp <sup>-/-</sup> |                     | 72.66%       | 30.74  |
| 3B'    | Disp <sup>-/-</sup> | EV                  | 100%         | 35.01  |
|        | Disp <sup>-/-</sup> | Disp <sup>tg</sup>  | 226.5%       | 125.0  |
|        | Disp <sup>-/-</sup> | Disp <sup>ΔL2</sup> | 147.9%       | 77.73  |
| 3C'    | nt Ctrl             | EV                  | 100%         | 22.17  |
|        | nt Ctrl             | Disp <sup>tg</sup>  | 159.3%       | 124.7  |
|        | nt Ctrl             | Disp <sup>ΔL2</sup> | 150.7%       | 65.78  |
| 4B'    | Disp <sup>-/-</sup> | EV                  | 100%         | 9.487  |
|        | Disp <sup>-/-</sup> | Ptc <sup>tg</sup>   | 334.3%       | 109.0  |
|        | Disp <sup>-/-</sup> | Ptc <sup>ΔL2</sup>  | 267.4%       | 99.58  |
| 4C'    | nt Ctrl             | EV                  | 100%         | 25.27  |
|        | nt Ctrl             | Ptc <sup>tg</sup>   | 156.5%       | 39.84  |
|        | nt Ctrl             | Ptc <sup>ΔL2</sup>  | 151.8%       | 60.22  |
| 5A'    | Disp <sup>-/-</sup> | - MβCD              | 100%         | 28.13  |
|        | Disp <sup>-/-</sup> | + MβCD (0.8mg/mL)   | 462.3%       | 203.0  |
| 5B'    | nt Ctrl             | - MβCD              | 100%         | 11.81  |
|        | nt Ctrl             | + MβCD (0.8mg/mL)   | 279.2%       | 166.8  |
| 5C     | nt Ctrl             | - MβCD              | 100%         | 3.704  |
|        | Disp <sup>-/-</sup> | - MβCD              | 110.8%       | 5.136  |
|        | nt Ctrl             | + MβCD (0.8mg/mL)   | 76.54%       | 4.950  |
|        | Disp <sup>-/-</sup> | + MβCD (0.8mg/mL)   | 79.03%       | 11.80  |
| 5D     | nt Ctrl             | EV                  | 100%         | 5.54   |
|        | Disp <sup>-/-</sup> | EV                  | 113.4%       | 8.6    |
|        | Disp <sup>-/-</sup> | Ptc <sup>ΔL2</sup>  | 96.56%       | 10.27  |
|        | Disp <sup>-/-</sup> | Disp <sup>tg</sup>  | 92.88%       | 17.52  |
| 5E     | nt Ctrl             |                     | 0.0057       | 0.0041 |
|        | Disp <sup>-/-</sup> |                     | 0.0012       | 0.0004 |
|        | nt Ctrl             | + FCS (10%)         | 0.0289       | 0.0087 |
|        | Disp <sup>-/-</sup> | + FCS (10%)         | 0.0251       | 0.0027 |
|        | nt Ctrl             | + MβCD (1mg/mL)     | 0.0439       | 0.0069 |
|        | Disp <sup>-/-</sup> | + MβCD (1mg/mL)     | 0.0442       | 0.0066 |
| 5F'    | nt Ctrl             | - HDL               | 100%         | 2.530  |
|        | nt Ctrl             | + HDL (120 μg/mL)   | 178.3%       | 41.49  |
|        | Disp <sup>-/-</sup> | - HDL               | 18.80%       | 9.783  |
|        | Disp <sup>-/-</sup> | + HDL (120 μg/mL)   | 62.00%       | 19.01  |
| S2A    | nt Ctrl             | Shh                 | 100%         | 13.05  |
|        | Disp <sup>-/-</sup> | Shh                 | 47.32%       | 3.666  |
|        | nt Ctrl             | untransfected       | 24.61%       | 0.778  |
|        | Disp <sup>-/-</sup> | untransfected       | 23.22%       | 0.696  |
| S2B    | nt Ctrl             | Shh                 | 100%         | 13.05  |
|        | Disp <sup>-/-</sup> | Shh                 | 105%         | 8.136  |
|        | nt Ctrl             | untransfected       | 24.61%       | 0.778  |
|        | Disp <sup>-/-</sup> | untransfected       | 23.22%       | 0.696  |

|     |                     |                   |        |       |
|-----|---------------------|-------------------|--------|-------|
| S2C | Disp <sup>-/-</sup> | mock              | 0.2550 | 0.019 |
|     | Disp <sup>-/-</sup> | 700 5E1           | 0.2728 | 0.017 |
|     | Disp <sup>-/-</sup> | 700               | 1.328  | 0.201 |
|     | Disp <sup>-/-</sup> | 500               | 1.395  | 0.059 |
|     | Disp <sup>-/-</sup> | 300               | 1.428  | 0.128 |
|     | Disp <sup>-/-</sup> | 100               | 0.6875 | 0.034 |
|     | Disp <sup>-/-</sup> | 30                | 0.4178 | 0.061 |
| S3C | Disp <sup>-/-</sup> | 0 (MβCD μg/mL)    | 100%   |       |
|     | Disp <sup>-/-</sup> | 100 (MβCD μg/mL)  | 145%   |       |
|     | Disp <sup>-/-</sup> | 200 (MβCD μg/mL)  | 180%   |       |
|     | Disp <sup>-/-</sup> | 300 (MβCD μg/mL)  | 201%   |       |
|     | Disp <sup>-/-</sup> | 400 (MβCD μg/mL)  | 358%   |       |
|     | Disp <sup>-/-</sup> | 500 (MβCD μg/mL)  | 420%   |       |
| S3D | Disp <sup>-/-</sup> | 0 (MβCD μg/mL)    | 100%   | 0     |
|     | Disp <sup>-/-</sup> | 100 (MβCD μg/mL)  | 169%   | 92    |
|     | Disp <sup>-/-</sup> | 200 (MβCD μg/mL)  | 318%   | 93    |
|     | Disp <sup>-/-</sup> | 300 (MβCD μg/mL)  | 300%   | 39    |
|     | Disp <sup>-/-</sup> | 400 (MβCD μg/mL)  | 344%   | 129   |
|     | Disp <sup>-/-</sup> | 500 (MβCD μg/mL)  | 375%   | 91    |
| S4A | nt Ctrl             |                   | 100%   | 2.254 |
|     | Disp <sup>-/-</sup> |                   | 107.8% | 2.269 |
| S4B | nt Ctrl             |                   | 100%   | 4.482 |
|     | Disp <sup>-/-</sup> |                   | 110.3% | 2.442 |
| S4C | nt Ctrl             |                   | 100%   | 3.662 |
|     | Disp <sup>-/-</sup> |                   | 110.8% | 3.165 |
| S4D | nt Ctrl             |                   | 100%   | 3.108 |
|     | Disp <sup>-/-</sup> |                   | 119.1% | 1.800 |
| S4E | nt Ctrl             |                   | 100%   | 1.734 |
|     | Disp <sup>-/-</sup> |                   | 109.7% | 2.924 |
| S4F | nt Ctrl             |                   | 100%   | 3.349 |
|     | Disp <sup>-/-</sup> |                   | 108.8% | 1.801 |
|     | nt Ctrl             | + MβCD (0.8mg/mL) | 81.51% | 0.449 |
|     | Disp <sup>-/-</sup> | + MβCD (0.8mg/mL) | 84.74% | 2.085 |
| S4G | nt Ctrl             |                   | 100%   | 6.439 |
|     | Disp <sup>-/-</sup> |                   | 107.2% | 5.698 |
|     | nt Ctrl             | + MβCD (0.8mg/mL) | 74.06% | 4.110 |
|     | Disp <sup>-/-</sup> | + MβCD (0.8mg/mL) | 76.18% | 13.85 |
| S5C | nt Ctrl             | 0 (HDL μg/mL)     | 100%   |       |
|     | nt Ctrl             | 72 (HDL μg/mL)    | 235%   |       |
|     | nt Ctrl             | 120 (HDL μg/mL)   | 1857%  |       |
|     | Disp <sup>-/-</sup> | 0 (HDL μg/mL)     | 7.522% |       |
|     | Disp <sup>-/-</sup> | 72 (HDL μg/mL)    | 53.37% |       |
|     | Disp <sup>-/-</sup> | 120 (HDL μg/mL)   | 128.8% |       |

**Table S3. Sequences of primers used in this study.**

| Name                           | FWD Primer                                   | REV Primer                                 | Cloning Method               |
|--------------------------------|----------------------------------------------|--------------------------------------------|------------------------------|
| Ptc $\Delta$ L2<br>fragment 1  | AAAAGCTTGGTACC<br>ACCATGGCCTCGGC             | AAGTCGACGGTGACTA<br>TATACATGTTGTAGAA       | Gibson Assembly              |
| Ptc $\Delta$ L2<br>fragment 2  | AAGTCGACGTGGGCT<br>ACCCCTTCCTGTTCTG          | AATCTAGACTAGTT<br>GGAGCTGCTCCCCC           | Gibson Assembly              |
| Disp $\Delta$ L2<br>fragment 1 | AAAAGCTTACCCGGGCAT<br>GGCTGTGATCAGCGGAAG     | AAACGCGTCTGGAA<br>CTCAGACAGCTCCAG          | Gibson Assembly              |
| Disp $\Delta$ L2<br>fragment 2 | AAACGCGTGACCTGC<br>AGGACAGCCTTTC             | AACTCGAGTTATAGTGTTT<br>TTATTAACAGACTCTCGC  | Gibson Assembly              |
| C <sup>25A</sup> Shh           | GGTGTGCCCCGGGCTGGCCG<br>CTGGGCCCGGCAGGGGGTTT | AAACCCCTGCCGGGCCAGCG<br>GCCAGCCCCGGGCACACC | Site directed<br>mutagenesis |
| C <sup>25S</sup> ShhN          | AAAAGCTTATGCTGCTGCTG<br>CTGGCCA              | TTGGATCCCTACTCTGCTTTCAC<br>AGAACAGTG       | Cloning into<br>pcDNA3.1     |
| C25 $\rightarrow$ S            | CGGGCTGGCCAGTGGGCCC<br>GG                    | CCGGGCCCACTGGCCAGCCCCG                     | Site directed<br>mutagenesis |
| Shh <sup>HA</sup>              | AACTCGAGATGCTGCTGCTG<br>CTGGCC               | AAACGCGTTCAGCTGGACTTGA<br>CCGCC            | Cloning into pIRES<br>vector |

**References:**

35. Stewart DP, Marada S, Bodeen WJ, Truong A, Sakurada SM, Pandit T, Pruett-Miller SM, Ogden SK (2018) Cleavage activates dispatched for Sonic Hedgehog ligand release. *Elife* 7. doi:10.7554/eLife.31678
